# Supplementary material
Source: publisher site journal article supplement (https://www.dovepress.com/article/333966)
Supplement: Supplementary file 1 [file get_supplementary_file.php]

## **Appendix 1. Risk of bias assessment**

Risk assessment domains for case reports:

- Q1: Were the patient's demographic characteristics clearly described?
- Q2: Was the patient's history clearly described and presented as a timeline?
- Q3: Was the current clinical condition of the patient on presentation clearly described?
- Q4: Were diagnostic tests or assessment methods and the results clearly described?
- Q5: Was the intervention(s) or treatment procedure(s) clearly described?
- Q6: Was the post-intervention clinical condition clearly described?
- Q7: Were adverse events (harms) or unanticipated events identified and described?
- Q8: Does the case report provide takeaway lessons?

Risk assessment domains for retrospective studies:

- Q1: Was the research question or objective in this paper clearly stated?
- Q2: Was the study population clearly specified and defined?
- Q3: Was the participation rate of eligible persons at least 50%?
- Q4: Were all the subjects selected or recruited from the same or similar populations (including the same time period)? Were inclusion and exclusion criteria for being in the study prespecified and applied uniformly to all participants?
- Q5: Was a sample size justification, power description, or variance and effect estimates provided?
- Q6: For the analyses in this paper, were the exposure(s) of interest measured prior to the outcome(s) being measured?
- Q7: Was the timeframe sufficient so that one could reasonably expect to see an association between exposure and outcome if it existed?
- Q8: For exposures that can vary in amount or level, did the study examine different levels of the exposure as related to the outcome (e.g., categories of exposure, or exposure measured as continuous variable)?
- Q9: Were the exposure measures (independent variables) clearly defined, valid, reliable, and implemented consistently across all study participants?
- Q10: Was the exposure(s) assessed more than once over time?
- Q11: Were the outcome measures (dependent variables) clearly defined, valid, reliable, and implemented consistently across all study participants?
- Q12: Were the outcome assessors blinded to the exposure status of participants?
- Q13: Was loss to follow-up after baseline 20% or less?
- Q14: Were key potential confounding variables measured and adjusted statistically for their impact on the relationship between exposure(s) and outcome(s)?

**Table 1. Risk of bias Assessment for case reports.**

| <b>Author</b>                | <b>Title</b>                                                                                                                                                                                                                       | <b>Study Type</b> | Q1  | Q2  | Q3  | Q4  | Q5  | Q6  | Q7  | Q8  |
|------------------------------|------------------------------------------------------------------------------------------------------------------------------------------------------------------------------------------------------------------------------------|-------------------|-----|-----|-----|-----|-----|-----|-----|-----|
| Rostami, et al. (1)          | Acute necrotizing encephalopathy with SARS-CoV-2 RNA confirmed in Cerebrospinal fluid                                                                                                                                              | Case report       | NO  | YES | YES | YES | NO  | YES | N/A | NO  |
| Al-olama, et al. (2)         | COVID-19-associated meningoencephalitis complicated with intracranial hemorrhage: a case report                                                                                                                                    | Case report       | NO  | YES | YES | YES | NO  | NO  | NO  | YES |
| Mardani, et al. (3)          | COVID-19 infection recurrence presenting with meningoencephalitis                                                                                                                                                                  | Case report       | NO  | YES | YES | YES | NO  | NO  | NO  | YES |
| Westhoff, et al. (4)         | Allograft infiltration and meningoencephalitis by SARS-CoV-2 in a pancreas-kidney transplant recipient                                                                                                                             | Case report       | NO  | YES | YES | YES | NO  | YES | YES | YES |
| Huang, et al. (5)            | SARS-CoV-2 Detected in Cerebrospinal Fluid by PCR in a Case of COVID-19 Encephalitis + Meningoencephalitis without respiratory failure in a young female patient with COVID-19 infection in Downtown Los Angeles, early April 2020 | Case report       | NO  | NO  | YES | YES | NO  | NO  | YES | YES |
| Cebrián, et al. (6)          | Headache and impaired consciousness level associated with SARS-CoV-2 in CSF: A case report                                                                                                                                         | Case report       | NO  | YES | YES | YES | NO  | YES | YES | YES |
| Domingues, et al. (7)        | First case of SARS-COV-2 sequencing in cerebrospinal fluid of a patient with suspected demyelinating disease                                                                                                                       | Case report       | YES | YES | YES | YES | NO  | YES | NO  | YES |
| Moriguchi, et al. (8)        | A first case of meningitis/encephalitis associated with SARS-Coronavirus-2                                                                                                                                                         | Case report       | NO  | YES | YES | YES | YES | YES | NO  | YES |
| Fadakar, et al. (9)          | A First Case of Acute Cerebellitis Associated with Coronavirus Disease (COVID-19): a Case Report and Literature Review                                                                                                             | Case report       | NO  | YES | YES | YES | YES | YES | NO  | YES |
| Demirci Otluglu, et al. (10) | Encephalomyelitis associated with Covid-19 infection: case report                                                                                                                                                                  | Case report       | NO  | YES | YES | YES | YES | YES | NO  | YES |

N/A= Not available

**Table 2.** Risk Assessment of cohort studies.

| Authors              | Title                                                                               | Study Type           | Q1  | Q2  | Q3 | Q4  | Q5 | Q6  | Q7  | Q8 | Q9  | Q10 | Q11 | Q12 | Q13 | Q14 |
|----------------------|-------------------------------------------------------------------------------------|----------------------|-----|-----|----|-----|----|-----|-----|----|-----|-----|-----|-----|-----|-----|
| Helms, et al. (11)   | Delirium and encephalopathy in severe COVID-19: a cohort analysis of ICU patients   | Prospective Cohort   | YES | YES | CD | YES | NO | YES | YES | NO | YES | NO  | YES | NO  | CD  | YES |
| Kremer, et al. (12)  | Brain MRI Findings in Severe COVID-19: A Retrospective Observational Study          | Retrospective Cohort | YES | YES | CD | YES | NO | YES | CD  | NO | YES | NO  | YES | NO  | CD  | NO  |
| Destras, et al. (13) | Systematic SARS-CoV-2 screening in cerebrospinal fluid during the COVID-19 pandemic | Retrospective Cohort | NO  | YES | NR | NO  | NO | NA  | NO  | NO | NO  | NO  | NO  | NR  | NO  | NO  |

CD = Cannot determine.

- Rostami E, Virhammar J, Kumlien E, Fallmar D, Frithiof R, Jackmann S, et al. Data from: Acute necrotizing encephalopathy with SARS-CoV-2 RNA confirmed in Cerebrospinal fluid. Dryad. 2020.
- Al-olama M, Rashid A, Garozzo D. COVID-19-associated meningoencephalitis complicated with intracranial hemorrhage: a case report. *Acta Neurochirurgica*. 2020;162(7):1495-9.
- Mardani M, Nadji SA, Sarhangipor KA, Sharifi-Razavi A, Baziboroun M. COVID-19 infection recurrence presenting with meningoencephalitis. *New Microbes New Infect*. 2020;37:100732.
- Westhoff TH, Seibert FS, Bauer F, Stervbo U, Anft M, Doevelaar AAN, et al. Allograft infiltration and meningoencephalitis by SARS-CoV-2 in a pancreas-kidney transplant recipient. *Am J Transplant*. 2020.
- Huang YH, Jiang D, Huang JT. SARS-CoV-2 Detected in Cerebrospinal Fluid by PCR in a Case of COVID-19 Encephalitis. *Brain Behav Immun*. 2020;87:149.
- Cebrián J, Gonzalez-Martinez A, García-Blanco MJ, Celdrán-Vivancos D, Palacios EL, Reig-Roselló G, et al. Headache and impaired consciousness level associated with SARS-CoV-2 in CSF: A case report. *Neurology*. 2020;95(6):266-8.
- Domingues RB, Mendes-Correa MC, de Moura Leite FBV, Sabino EC, Salarini DZ, Claro I, et al. First case of SARS-COV-2 sequencing in cerebrospinal fluid of a patient with suspected demyelinating disease. *Journal of Neurology*. 2020.
- Moriguchi T, Harii N, Goto J, Harada D, Sugawara H, Takamino J, et al. A first case of meningitis/encephalitis associated with SARS-Coronavirus-2. *International Journal of Infectious Diseases*. 2020;94:55-8.

9. Fadakar N, Ghaemmaghami S, Masoompour SM, Shirazi Yeganeh B, Akbari A, Hooshmandi S, et al. A First Case of Acute Cerebellitis Associated with Coronavirus Disease (COVID-19): a Case Report and Literature Review. *Cerebellum*. 2020:1-4.
10. Demirci Otluglu G, Yener U, Demir MK, Yilmaz B. Encephalomyelitis associated with Covid-19 infection: case report. *British Journal of Neurosurgery*. 2020:1-3.
11. Helms J, Kremer S, Merdji H, Schenck M, Severac F, Clere-Jehl R, et al. Delirium and encephalopathy in severe COVID-19: a cohort analysis of ICU patients. *Crit Care*. 2020;24(1):491.
12. Kremer S, Lersy F, de Sèze J, Ferré JC, Maamar A, Carsin-Nicol B, et al. Brain MRI Findings in Severe COVID-19: A Retrospective Observational Study. *Radiology*. 2020:202222.
13. Destras G, Bal A, Escuret V, Morfin F, Lina B, Josset L. Systematic SARS-CoV-2 screening in cerebrospinal fluid during the COVID-19 pandemic. *The Lancet Microbe*. 2020.
